# Supplementary material
Source: publisher figshare collection journal article supplement (https://gsajournals.figshare.com/ndownloader/files/21823221)
Supplement: Supplementary file 1 [file 21823221]

**Figure S4**

Comparison between SMR and LBR for discovering G×S interactions. Manhattan plot showing *pvalue*-diff for each analyzed SNP. SNPs are colored yellow if they were focal SNPs with a ≥ 0.9 and colored red if they were focal SNPs with a ≥ 0.95. The dashed horizontal lines denote *p*-diff thresholds of 1x10-5 and 5x10-8.
